# Supplementary material for: Tumoricidal Potential of Novel Amino-1,10-phenanthroline Derived Imine Ligands: Chemical Preparation, Structure, and Biological Investigations
Source: PubMed Central journal article supplement (PMC7356530; doi:10.3390/molecules25122865), 2020-06-22
Supplement: molecules-25-02865-s001.pdf [file molecules-25-02865-s001.pdf]

## Supporting information

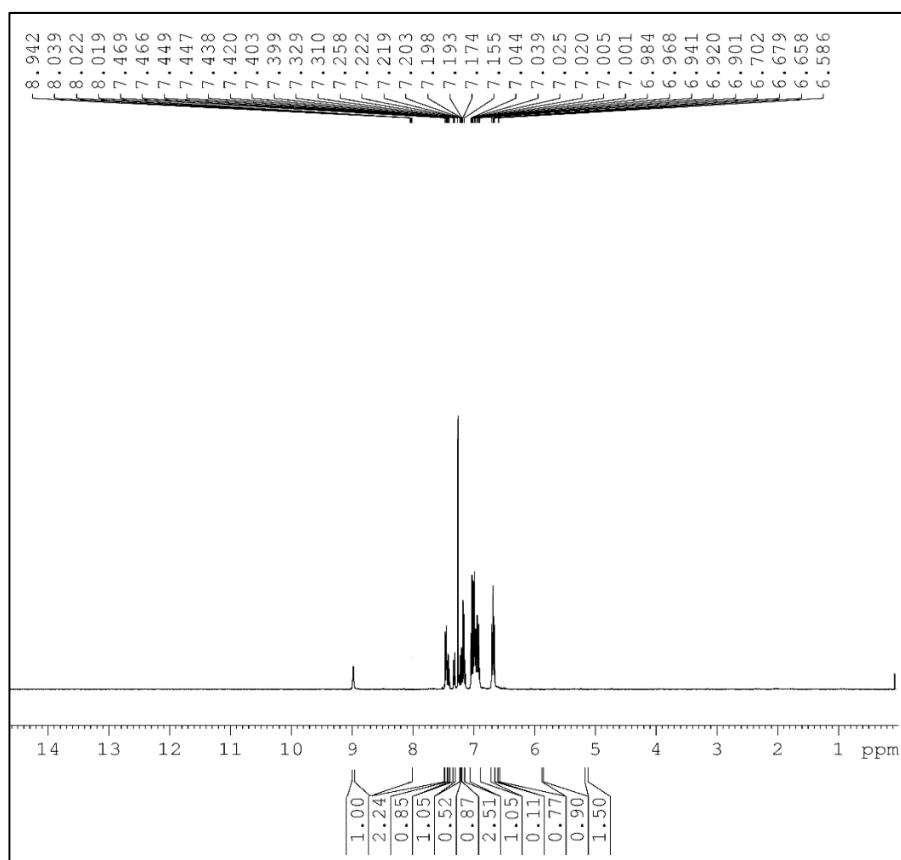

Figure S1: <sup>1</sup>H-NMR spectrum of PIB ligand.

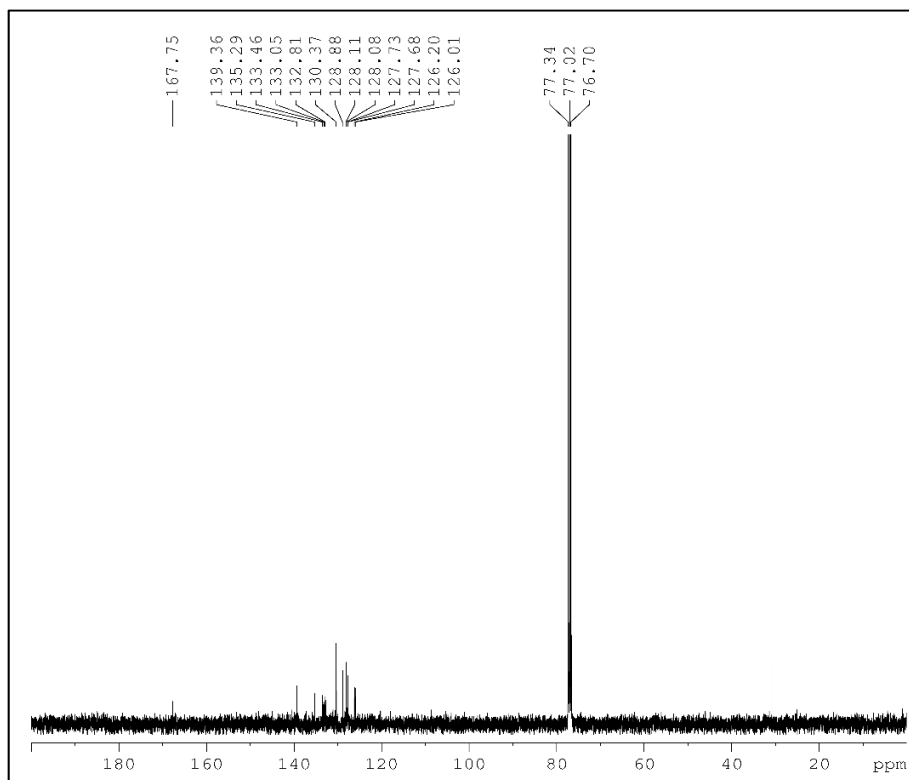

Figure S2:  $^{13}\text{C}$ -NMR spectrum of PIB ligand.

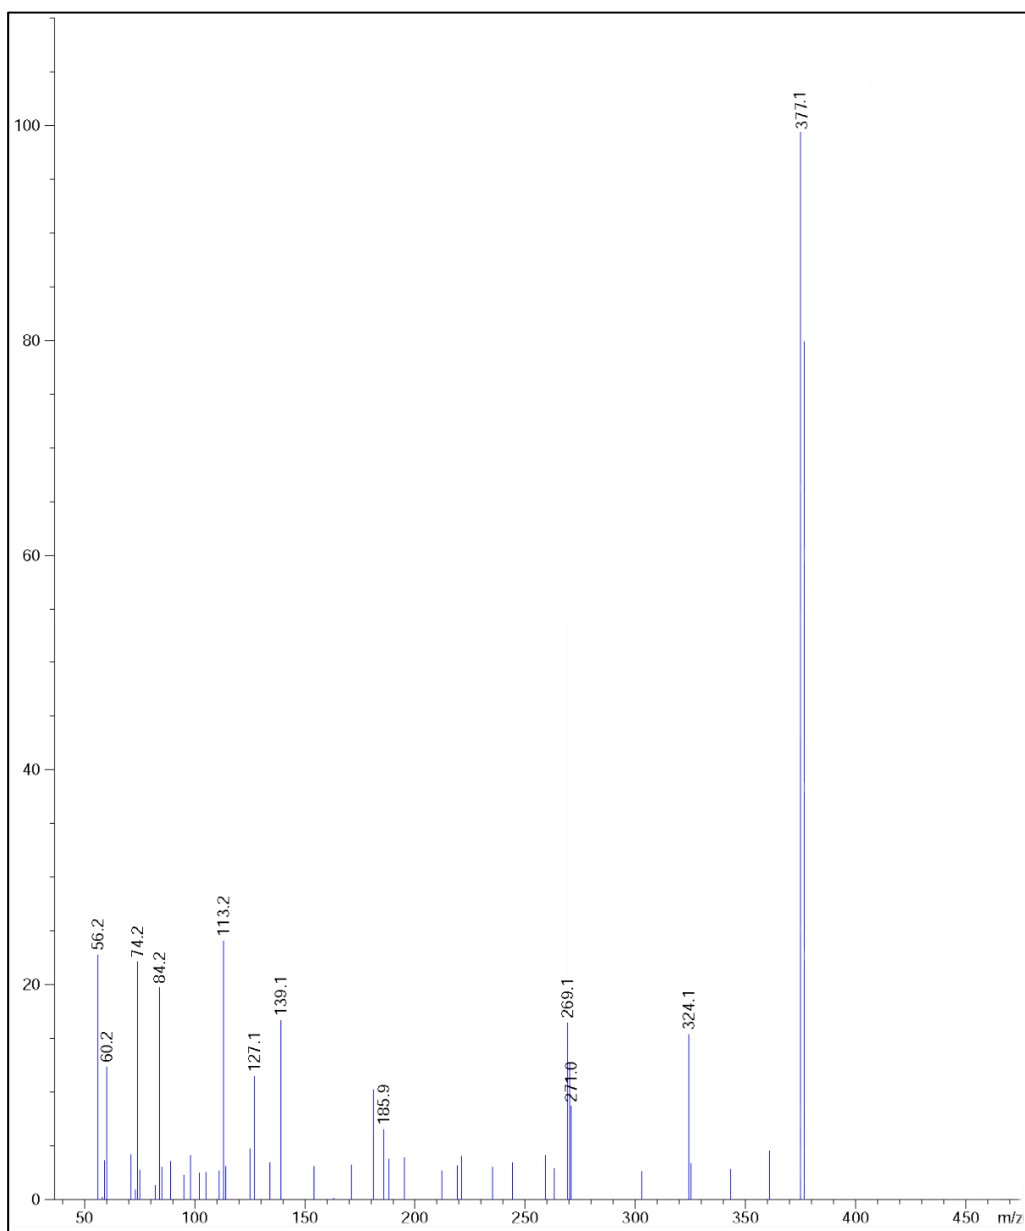

**Figure S3:** Mass spectrum of PIB ligand.

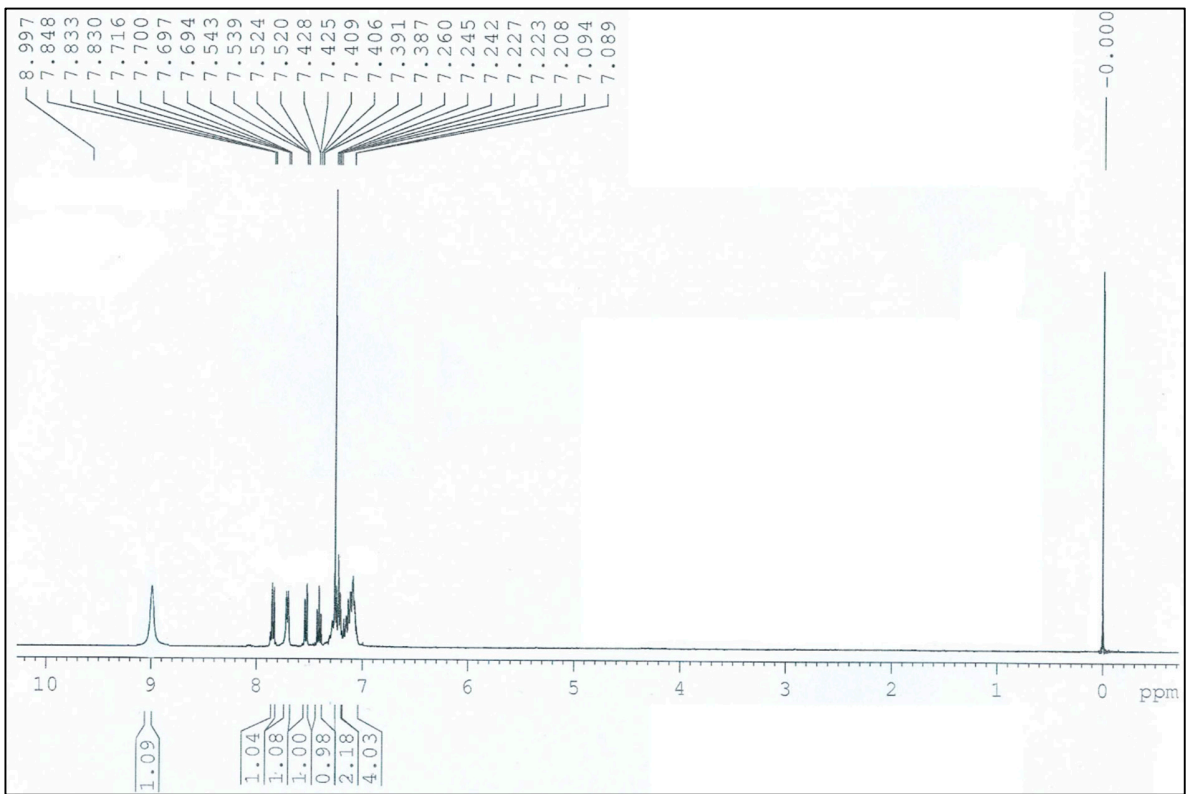

**Figure S4:** <sup>1</sup>H-NMR spectrum of PIB ligand.

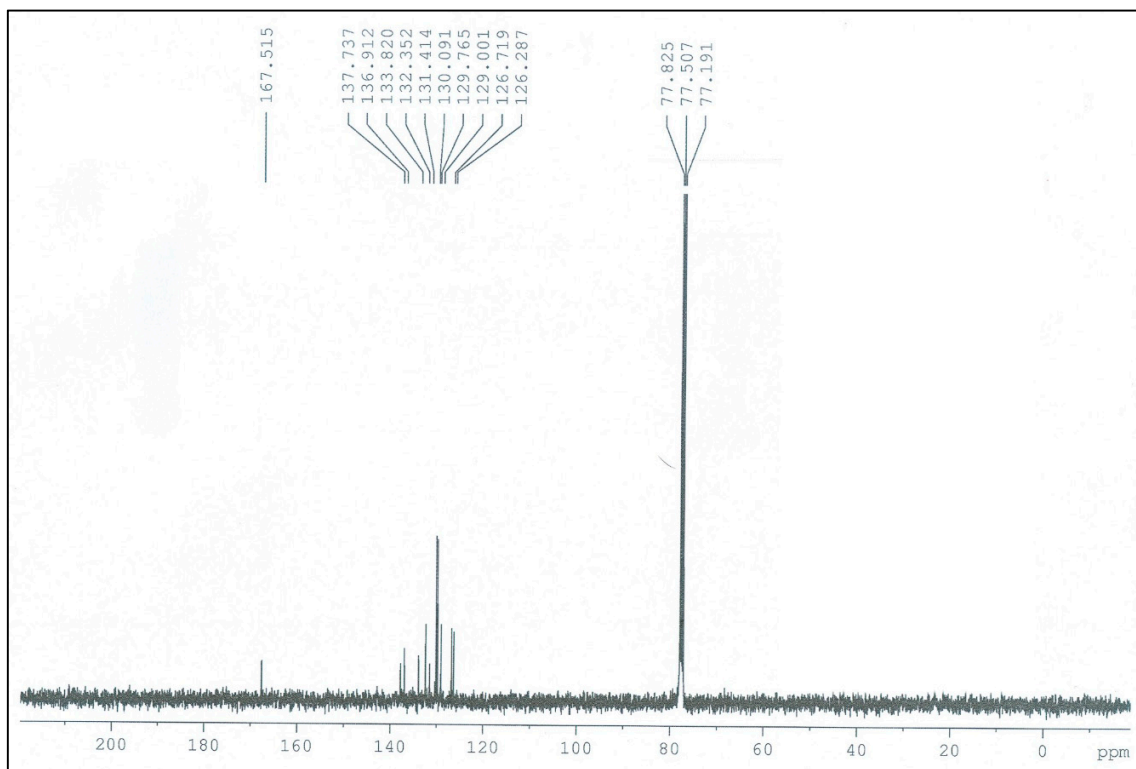

**Figure S5:**  $^{13}\text{C}$ -NMR spectrum of PTM ligand.

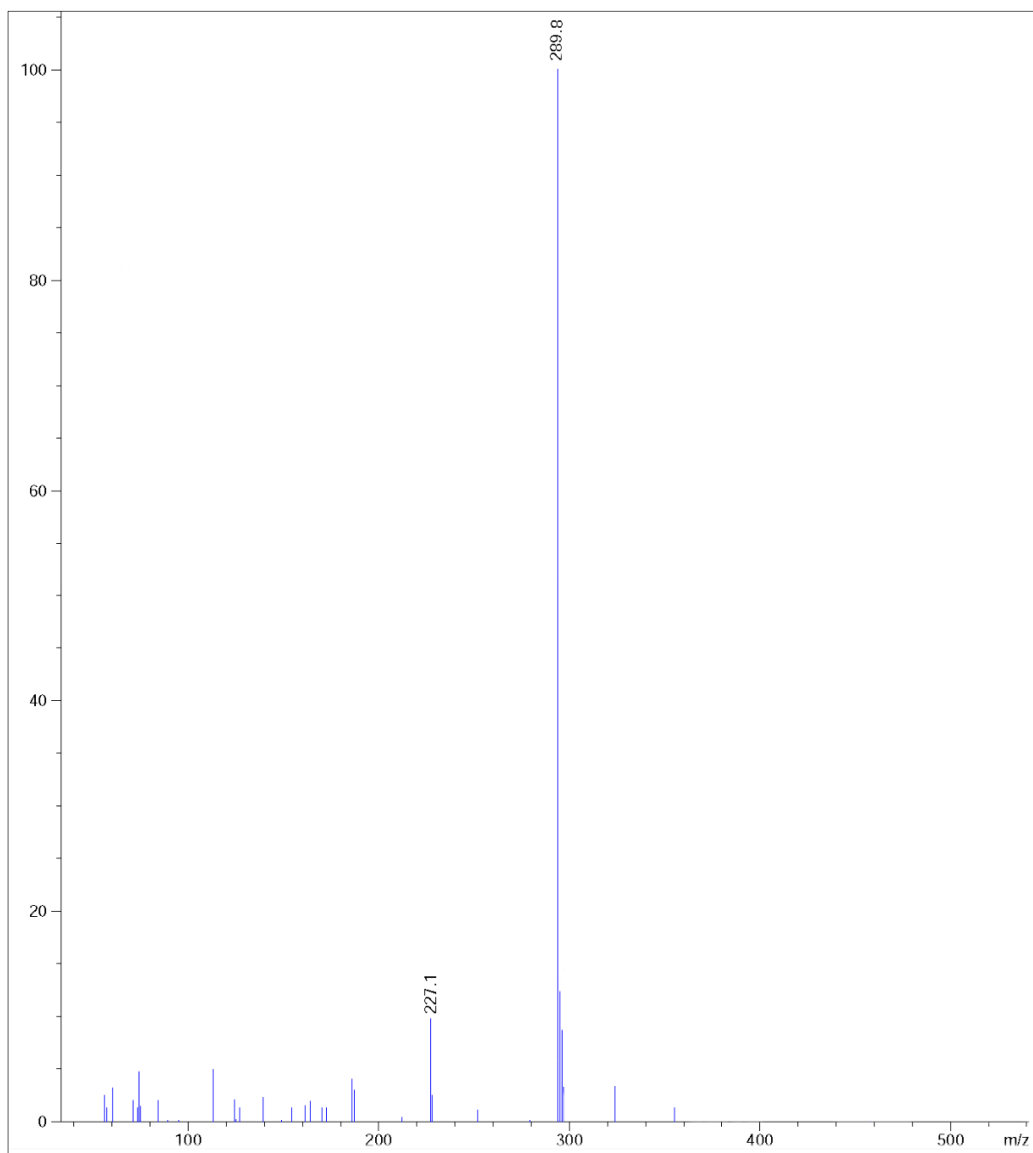

**Figure S6:** Mass spectrum of PTM ligand.
